# Supplementary material for: Highly electrocatalytic carbon black/copper sulfide composite counter electrodes fabricated by a facile method for quantum-dot-sensitized solar cells
Source: Royal Society of Chemistry journal article supplement (doi:10.1039/c7ta06023h), 2017-01-01
Supplement: c7ta06023h1.pdf [file c7ta06023h1.pdf]

## ***Supplementary Information***

# Highly Electrocatalytic Carbon Black/Copper Sulfide Composite Counter Electrodes Fabricated by a Facile Method for Quantum-Dot-Sensitized Solar Cells

I-Ping Liu,<sup>a</sup> Hsisheng Teng<sup>abc</sup> and Yuh-Lang Lee<sup>\*ab</sup>

<sup>a</sup>Department of Chemical Engineering, National Cheng Kung University, Tainan 70101, Taiwan (R. O. C.)

<sup>b</sup>Research Center for Energy Technology and Strategy (RCETS), National Cheng Kung University, Tainan 70101, Taiwan (R. O. C.)

<sup>c</sup>Center for Micro/Nano Science and Technology, National Cheng Kung University, Tainan 70101, Taiwan (R. O. C.)

\*Corresponding author. *E-mail address*: yllee@mail.ncku.edu.tw (Y.-L. Lee)

## EXPERIMENTAL SECTION

### Materials

Carbon black powder (PRINTEX®L, furnace black, 99%) was acquired from Orion Engineered Carbons; according to the manufacturer's specifications, this powder's properties include: BET surface area of  $150 \text{ m}^2 \text{ g}^{-1}$ , particle diameter of  $\sim 23 \text{ nm}$ , pH value of 9.0, sieve residue less than 25 ppm ( $45 \text{ }\mu\text{m}$  residue), toluene extraction less than 0.1% (8 h) and DBP absorption of 120 ml per 100 g powder.

Titanium dioxide pastes of 30 NR-D and PST-400C were procured from Dyesol and JGC C&C (JGC Catalysts and Chemicals Ltd., Japan), respectively. Copper(II) nitrate trihydrate  $[\text{Cu}(\text{NO}_3)_2 \cdot 3\text{H}_2\text{O}]$ , 99+% and cadmium nitrate tetrahydrate  $[\text{Cd}(\text{NO}_3)_2 \cdot 4\text{H}_2\text{O}]$ , 99% were obtained from Sigma-Aldrich. Ethyl cellulose (EC, 10 cps, 48% in ethoxyl content), selenium dioxide ( $\text{SeO}_2$ , 99.9%) and sodium borohydride ( $\text{NaBH}_4$ , 99.99%) were acquired from Aldrich Chemistry. Copper(II) sulfate pentahydrate  $[\text{CuSO}_4 \cdot 5\text{H}_2\text{O}]$ , 100.8%, sodium acetate anhydrous ( $\text{CH}_3\text{COONa}$ , 99.9%) and ethanol (99.9%) were purchased from J. T. Baker. Zinc acetate dehydrate  $[\text{Zn}(\text{CH}_3\text{COO})_2 \cdot 2\text{H}_2\text{O}]$ , 99+% and sulfur powder (S, 99.5+%) were obtained from Riedel-de Haën. Sodium sulfide nonahydrate ( $\text{Na}_2\text{S} \cdot 9\text{H}_2\text{O}$ , 98+%), thioacetamide ( $\text{C}_2\text{H}_5\text{NS}$ , >98%), acetic acid ( $\text{CH}_3\text{COOH}$ , 99.5%), methanol (99.9%) and titanium(IV) chloride ( $\text{TiCl}_4$ , 98%) were acquired from Acros Organics, Tokyo Chemical Industry, Kanto Chemical, Merck and Fluka, respectively. All chemicals and solvents were used as received without further purification.

## Preparation of Quantum-Dot-Sensitized Photoelectrodes

In this study, mesoporous titanium dioxide ( $\text{TiO}_2$ ) films were utilized to accumulate semiconductor QD sensitizers. Prior to printing the  $\text{TiO}_2$  films, a compact layer was coated on cleaned FTO substrates by the  $\text{TiCl}_4$  pre-treatment (a reaction in a 40 mM aqueous  $\text{TiCl}_4$  solution at  $70^\circ\text{C}$  for 30 min). A transparent layer was first screen-printed onto the  $\text{TiCl}_4$ -treated FTO substrate using the 30 NR-D  $\text{TiO}_2$  paste, and a light-scattering layer was further printed directly on top of the transparent film with the PST-400C paste. After sintering at  $500^\circ\text{C}$ , the mesoporous  $\text{TiO}_2$  film showed a double-layered architecture and a total thickness of  $\sim 12.5\ \mu\text{m}$  ( $7.5 \pm 0.4$  and  $5.0 \pm 0.2\ \mu\text{m}$  for the transparent and scattering regions, respectively).

Semiconductor QD sensitizers were synthesized by successive ionic layer adsorption and reaction (SILAR). SILAR is a conventional solution-processing method, in which the  $\text{TiO}_2$  films are dipped in cationic and anionic precursors alternately. Upon finishing each dipping, rinsing and drying were executed. For the CdS QD, the cationic precursor was a methanol solution containing 0.03 M  $\text{Cd}(\text{NO}_3)_2 \cdot 4\text{H}_2\text{O}$  and 0.05 M  $\text{CH}_3\text{COONa}$ , and the anionic precursor was a methanol/deionized water mixture (7/3 by volume) containing 0.06 M  $\text{Na}_2\text{S}$ . For the CdSe sensitizer, the cationic precursor was 0.03 M  $\text{Cd}(\text{NO}_3)_2 \cdot 4\text{H}_2\text{O}$  in ethanol, and the anionic precursor was prepared by vigorously stirring a mixture of 0.03 M  $\text{SeO}_2$  and 0.06 M  $\text{NaBH}_4$  in ethanol until becoming clear under a nitrogen atmosphere. A complete SILAR cycle involved dipping the  $\text{TiO}_2$  films once in both cationic and anionic precursors; in this work, CdS and CdS/CdSe photoelectrodes were prepared by 5 and 2/6 SILAR cycles, respectively, and the reaction time was fixed to 1 min for each dipping. After the QD deposition, all the photoelectrodes were further coated with ZnS passivation layers by the SILAR method. The as-prepared QD electrodes were dipped sequentially into a 0.1 M  $\text{Zn}(\text{CH}_3\text{COO})_2 \cdot 2\text{H}_2\text{O}$  methanol

solution for 1 min, and then into a methanol/deionized water mixture (7/3 by volume) containing 0.1 M Na<sub>2</sub>S for 1 min. Two SILAR cycles were performed for the ZnS deposition; after that, the preparation of QD-sensitized photoelectrode was accomplished.

### **Characterization and Measurements**

The Raman spectrum of the CB/Cu<sub>x</sub>S composite film was accumulated using a confocal DXR Raman microscopy system (Thermo Scientific, USA) with a 532 nm laser source at 7 mW. A transmission electron microscope (TEM, H-7500, Hitachi, Japan) was employed to investigate the microstructure of the composite sample. The morphology of composite electrodes was examined using a scanning electron microscope (SEM, SU8010, Hitachi, Japan). The chemical states of elements in composite films were studied using an X-ray photoelectron spectroscopy (XPS, PHI 5000 VersaProbe, ULVAC-PHI, Inc., Japan) with Al K $\alpha$  as the X-ray source (1486.7 eV for excitation energy); elemental binding energies were determined by calibration and fixing the C(1s) peak to 284.8 eV, and peak deconvolution was carried out using XPSPEAK 4.1 software with the Shirley-type baseline, as well as Gaussian–Lorentzian functions. Electrochemical impedance spectroscopy (EIS) and Tafel polarization were measured using a potentiostat (PGSTAT30, Metrohm Autolab, Netherlands) equipped with an FRA module; the EIS measurements were conducted at 0 V with 10 mV AC sinusoidal amplitudes applied over a frequency range of 100 kHz to 100 mHz, and the Tafel polarization analysis was performed at a scan rate of 10 mV sec<sup>-1</sup>. A CH Instruments potentiostat (CHI627D, USA) was utilized to carry out cyclic voltammetry with a three-electrode system at a scan rate of 50 mV sec<sup>-1</sup>; a platinum foil and a saturated calomel electrode (SCE) were adopted as the counter and reference electrodes, respectively, and the electrolyte was an aqueous polysulfide solution containing 1.0 M S and 1.0 M Na<sub>2</sub>S. The photovoltaic properties ( $J$ – $V$  curves) of the assembled solar cells were

recorded under simulated sunlight irradiation using a computer-controlled digital source meter (6240A, ADCMT, Japan) scanning from 0 V to the open-circuit voltage at a scan rate of 50 mV sec<sup>-1</sup>. Calibration of the solar simulator (XES-301S, AM 1.5G, class AAA, San-Ei Electric, Japan) was implemented with a reference silicon cell (BK7, PV Measurements, USA) which was certified by the National Renewable Energy Laboratory in the USA. Incident photon-to-current efficiency spectra were analyzed using a quantum efficiency measurement system equipped with a xenon lamp (QE-R3011, DC mode, Enlitech, Taiwan).

**Table S1.** Comparison of photovoltaic performance based on CdS/CdSe sensitizers and carbon-related composite counter electrodes.

| Carbon-related composite counter electrode | $J_{sc}$<br>(mA cm <sup>-2</sup> ) | $V_{oc}$<br>(mV) | FF    | $\eta$<br>(%) | Reference    |
|--------------------------------------------|------------------------------------|------------------|-------|---------------|--------------|
| RGO-Cu <sub>2</sub> S                      | 18.4                               | 520              | 0.46  | 4.40          | 36           |
| RGO-Cu <sub>2</sub> S                      | 15.85                              | 556              | 0.44  | 3.85          | 37           |
| PbS/CB                                     | 13.32                              | 509.58           | 0.58  | 3.91          | 38           |
| CuInS <sub>2</sub> /carbon                 | 14.16                              | 512              | 0.60  | 4.32          | 39           |
| Cu <sub>2</sub> S/carbon                   | 13.69                              | 593.0            | 0.48  | 3.87          | 40           |
| CB/Cu <sub>x</sub> S-3                     | 16.96                              | 584              | 0.567 | 5.62          | present work |

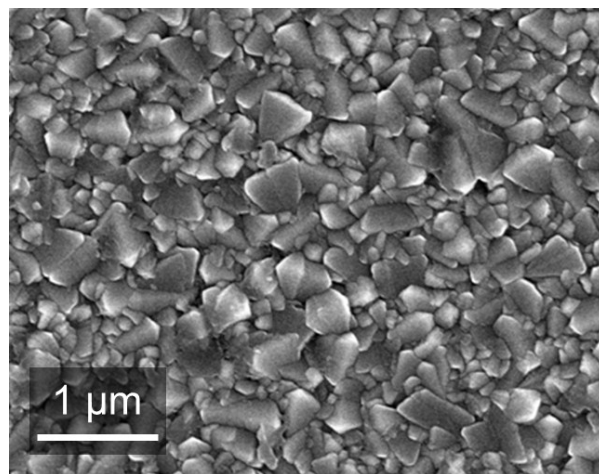

**Fig. S1** Top-view SEM image of a pristine FTO surface.

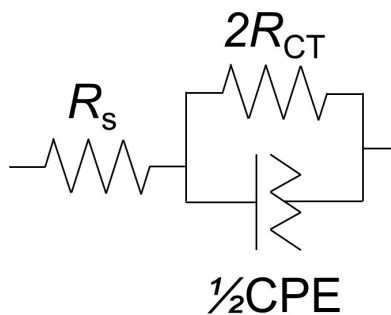

**Fig. S2** Equivalent circuit utilized in the EIS measurements.

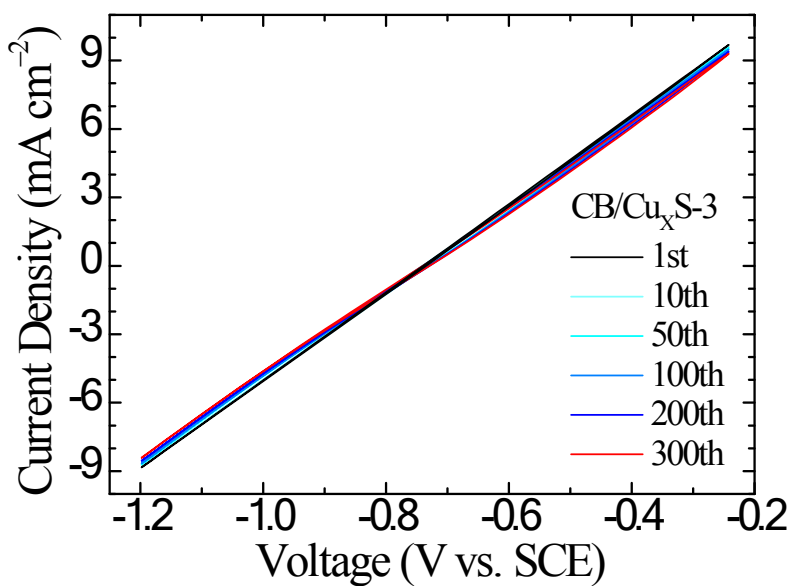

**Fig. S3** Cyclic voltammograms of the CB/Cu<sub>x</sub>S-3 thin film electrode at various specific cycles measured using a three-electrode system (a continuous measurement for 300 cycles at a scan rate of 50 mV sec<sup>-1</sup>).

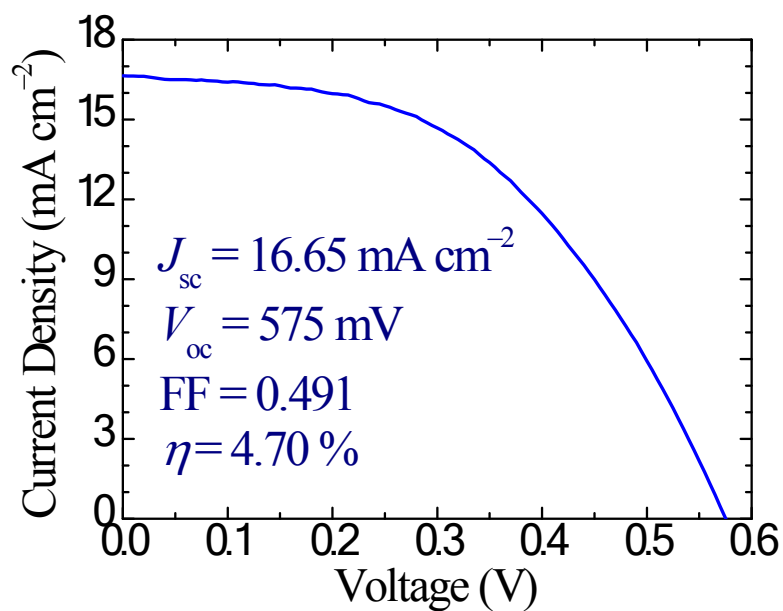

**Fig. S4** Photovoltaic  $J$ - $V$  curve of the CdS/CdSe QDSSC based on the CBD-CuS counter electrode measured under standard 1 sun irradiation.

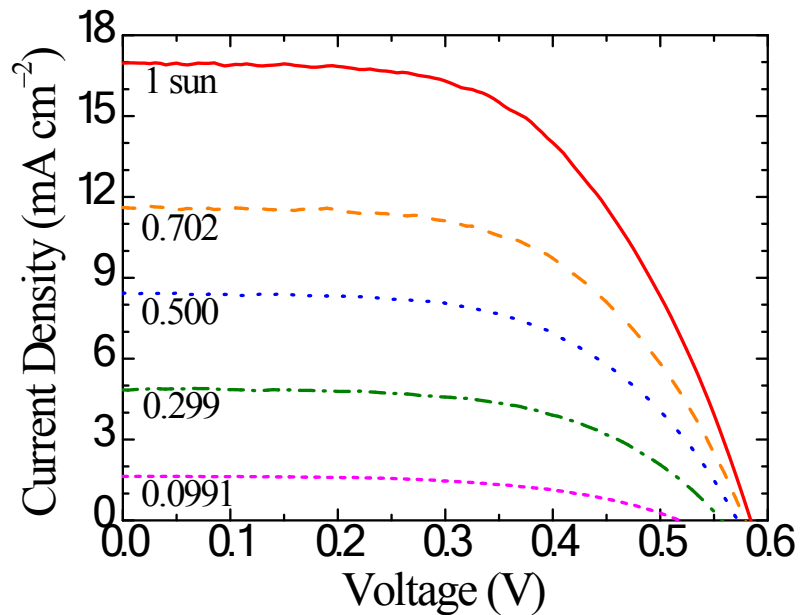

**Fig. S5** Photovoltaic  $J$ - $V$  curves of the CdS/CdSe QDSSC employing a CB/Cu<sub>x</sub>S-3 composite thin film counter electrode measured under different irradiation conditions (in sun).
